# Supplementary material for: Inhibition of RUNX2 Transcriptional Activity Blocks the Proliferation, Migration and Invasion of Epithelial Ovarian Carcinoma Cells
Source: PLoS One. 2013 Oct 4;8(10):e74384. doi: 10.1371/journal.pone.0074384 (PMC3790792; doi:10.1371/journal.pone.0074384)
Supplement: Table S2 — Genes, differentially expressed in SKOV3 cells (≥2 fold) following RUNX2 knockdown. (XLS) [file pone.0074384.s009.xls]

## Sheet: Feuil1
Table S2. Genes, differentially expressed in SKOV3 cells (≥ 2 fold) following RUNX2 knockdown
A. Upregulated genes
Normalized Data	Genbank	Description
6.792	NM_004100	Homo sapiens eyes absent homolog 4 (Drosophila) (EYA4), transcript variant 1, mRNA [NM_004100]
6.076	NM_024508	Homo sapiens zinc finger, BED-type containing 2 (ZBED2), mRNA [NM_024508]
5.242	CR616003	full-length cDNA clone CS0DM012YB14 of Fetal liver of Homo sapiens (human). [CR616003]
4.619	NM_203487	Homo sapiens protocadherin 9 (PCDH9), transcript variant 1, mRNA [NM_203487]
4.57	NM_014260	Homo sapiens HLA class II region expressed gene KE2 (HKE2), mRNA [NM_014260]
4.503	NM_013244	Homo sapiens UDP-N-acetylglucosamine:a-1,3-D-mannoside beta-1,4-N-acetylglucosaminyltransferase IV (GNTIVH), mRNA [NM_013244]
3.84	NM_005218	Homo sapiens defensin, beta 1 (DEFB1), mRNA [NM_005218]
3.755	NM_005573	Homo sapiens lamin B1 (LMNB1), mRNA [NM_005573]
3.598	THC2272599	CA438893 UI-H-DH0-aut-f-13-0-UI.s1 NCI_CGAP_DH0 Homo sapiens cDNA clone UI-H-DH0-aut-f-13-0-UI 3', mRNA sequence [CA438893]
3.582	NM_001933	Homo sapiens dihydrolipoamide S-succinyltransferase (E2 component of 2-oxo-glutarate complex) (DLST), mRNA [NM_001933]
3.549	NM_001885	Homo sapiens crystallin, alpha B (CRYAB), mRNA [NM_001885]
3.383	AK026773	Homo sapiens cDNA: FLJ23120 fis, clone LNG07989. [AK026773]
3.341	NM_001155	Homo sapiens annexin A6 (ANXA6), transcript variant 1, mRNA [NM_001155]
3.339	NM_002471	Homo sapiens myosin, heavy polypeptide 6, cardiac muscle, alpha (cardiomyopathy, hypertrophic 1) (MYH6), mRNA [NM_002471]
3.299	NM_017742	Homo sapiens zinc finger, CCHC domain containing 2 (ZCCHC2), mRNA [NM_017742]
3.298	BC035691	Homo sapiens, clone IMAGE:5756011, mRNA. [BC035691]
3.203	NM_207371	Homo sapiens FLJ45187 protein (FLJ45187), mRNA [NM_207371]
3.133	NM_020403	Homo sapiens protocadherin 9 (PCDH9), transcript variant 2, mRNA [NM_020403]
3.133	NM_002784	Homo sapiens pregnancy specific beta-1-glycoprotein 9 (PSG9), mRNA [NM_002784]
3.063	NM_018124	Homo sapiens ring finger and WD repeat domain 3 (RFWD3), mRNA [NM_018124]
3.039	NM_003105	Homo sapiens sortilin-related receptor, L(DLR class) A repeats-containing (SORL1), mRNA [NM_003105]
3.033	NM_002785	Homo sapiens pregnancy specific beta-1-glycoprotein 11 (PSG11), transcript variant 1, mRNA [NM_002785]
3.018	NM_014502	Homo sapiens PRP19/PSO4 pre-mRNA processing factor 19 homolog (S. cerevisiae) (PRPF19), mRNA [NM_014502]
2.997	NM_176812	Homo sapiens chromatin modifying protein 4B (CHMP4B), mRNA [NM_176812]
2.89	NM_153840	Homo sapiens G protein-coupled receptor 110 (GPR110), transcript variant 1, mRNA [NM_153840]
2.882	NM_012300	Homo sapiens F-box and WD-40 domain protein 11 (FBXW11), transcript variant 3, mRNA [NM_012300]
2.872	NM_000117	Homo sapiens emerin (Emery-Dreifuss muscular dystrophy) (EMD), mRNA [NM_000117]
2.865	NM_003379	Homo sapiens villin 2 (ezrin) (VIL2), mRNA [NM_003379]
2.851	NM_006990	Homo sapiens WAS protein family, member 2 (WASF2), mRNA [NM_006990]
2.844	AF130099	Homo sapiens clone FLC1464 PRO3102 mRNA, complete cds. [AF130099]
2.83	BC032311	Homo sapiens chromosome 13 open reading frame 18, mRNA (cDNA clone MGC:40256 IMAGE:5212065), complete cds. [BC032311]
2.791	NM_001191	Homo sapiens BCL2-like 1 (BCL2L1), nuclear gene encoding mitochondrial protein, transcript variant 2, mRNA [NM_001191]
2.778	AK092668	Homo sapiens cDNA FLJ35349 fis, clone PUAEN1000039. [AK092668]
2.767	AW444553	AW444553 UI-H-BI3-ajv-c-10-0-UI.s1 NCI_CGAP_Sub5 Homo sapiens cDNA clone IMAGE:2732947 3', mRNA sequence [AW444553]
2.714	NM_001864	Homo sapiens cytochrome c oxidase subunit VIIa polypeptide 1 (muscle) (COX7A1), mRNA [NM_001864]
2.658	BI050742	BI050742 RC6-GN0071-080101-025-H04 GN0071 Homo sapiens cDNA, mRNA sequence [BI050742]
2.656	NM_014891	Homo sapiens PDGFA associated protein 1 (PDAP1), mRNA [NM_014891]
2.648	AF001540	Homo sapiens clone alpha1 mRNA sequence. [AF001540]
2.642	AF531436	Homo sapiens CGI-301 protein mRNA, complete cds. [AF531436]
2.633	NM_016179	Homo sapiens transient receptor potential cation channel, subfamily C, member 4 (TRPC4), mRNA [NM_016179]
2.621	AY517556	Homo sapiens hypothetical rhabdomyosarcoma antigen MU-RMS-40.1 mRNA, partial cds. [AY517556]
2.611	NM_004309	Homo sapiens Rho GDP dissociation inhibitor (GDI) alpha (ARHGDIA), mRNA [NM_004309]
2.61	NM_014604	Homo sapiens Tax1 (human T-cell leukemia virus type I) binding protein 3 (TAX1BP3), mRNA [NM_014604]
2.598	NM_014237	Homo sapiens a disintegrin and metalloproteinase domain 18 (ADAM18), mRNA [NM_014237]
2.598	NM_182513	Homo sapiens spindle pole body component 24 homolog (S. cerevisiae) (SPBC24), mRNA [NM_182513]
2.59	NM_000211	Homo sapiens integrin, beta 2 (antigen CD18 (p95), lymphocyte function-associated antigen 1; macrophage antigen 1 (mac-1) beta subunit) (ITGB2), mRNA [NM_000211]
2.585	AK098812	Homo sapiens cDNA FLJ25946 fis, clone JTH14258. [AK098812]
2.568	BC006267	Homo sapiens asparaginase like 1, mRNA (cDNA clone IMAGE:3952485), complete cds. [BC006267]
2.567	NM_006640	Homo sapiens septin 9 (SEPT9), mRNA [NM_006640]
2.539	NM_001007236	Homo sapiens endogenous retroviral sequence K, 6 (ERVK6), mRNA [NM_001007236]
2.521	AA768754	AA768754 ob22h03.s1 NCI_CGAP_Kid5 Homo sapiens cDNA clone IMAGE:1324469 3', mRNA sequence [AA768754]
2.5	NM_001010911	Homo sapiens chromosome 10 open reading frame 114 (C10orf114), mRNA [NM_001010911]
2.476	NM_003315	Homo sapiens DnaJ (Hsp40) homolog, subfamily C, member 7 (DNAJC7), mRNA [NM_003315]
2.462	NM_005824	Homo sapiens leucine rich repeat containing 17 (LRRC17), mRNA [NM_005824]
2.455	NM_002227	Homo sapiens Janus kinase 1 (a protein tyrosine kinase) (JAK1), mRNA [NM_002227]
2.449	NM_000339	Homo sapiens solute carrier family 12 (sodium/chloride transporters), member 3 (SLC12A3), mRNA [NM_000339]
2.444	NM_024572	Homo sapiens UDP-N-acetyl-alpha-D-galactosamine:polypeptide N-acetylgalactosaminyltransferase 14 (GalNAc-T14) (GALNT14), mRNA [NM_024572]
2.444	NM_022903	Homo sapiens hypothetical protein FLJ12800 (FLJ12800), mRNA [NM_022903]
2.43	NM_004625	Homo sapiens wingless-type MMTV integration site family, member 7A (WNT7A), mRNA [NM_004625]
2.412	AK021443	Homo sapiens cDNA FLJ11381 fis, clone HEMBA1000501. [AK021443]
2.338	NM_014762	Homo sapiens 24-dehydrocholesterol reductase (DHCR24), mRNA [NM_014762]
2.333	NM_000422	Homo sapiens keratin 17 (KRT17), mRNA [NM_000422]
2.305	CB111670	K-EST0153390 L5HLK1 Homo sapiens cDNA clone L5HLK1-3-D02 5', mRNA sequence [CB111670]
2.301	AJ001898	Homo sapiens mRNA for alternative form of GDNF; HFK4. [AJ001898]
2.279	N28017	N28017 yx50d12.r1 Soares melanocyte 2NbHM Homo sapiens cDNA clone IMAGE:265175 5' similar to gb:D10522 Human mRNA for 80K-L protein, complete cds. (HUMAN);contains Alu repetitive element;, mRNA sequence [N28017]
2.263	NM_005764	Homo sapiens PDZK1 interacting protein 1 (PDZK1IP1), mRNA [NM_005764]
2.247	AK026517	Homo sapiens cDNA: FLJ22864 fis, clone KAT02164. [AK026517]
2.244	NM_001866	Homo sapiens cytochrome c oxidase subunit VIIb (COX7B), nuclear gene encoding mitochondrial protein, mRNA [NM_001866]
2.22	BC018548	Homo sapiens F-box and leucine-rich repeat protein 17, mRNA (cDNA clone IMAGE:4215262), partial cds. [BC018548]
2.219	NM_002764	Homo sapiens phosphoribosyl pyrophosphate synthetase 1 (PRPS1), mRNA [NM_002764]
2.213	NM_020157	Homo sapiens otoraplin (OTOR), mRNA [NM_020157]
2.208	NM_130901	Homo sapiens chromosome 15 open reading frame 16 (C15orf16), mRNA [NM_130901]
2.199	NM_203304	Homo sapiens ring finger and KH domain containing 1 (RKHD1), mRNA [NM_203304]
2.195	NM_001014440	Homo sapiens similar to MGC52679 protein (LOC440836), mRNA [NM_001014440]
2.188	NM_001901	Homo sapiens connective tissue growth factor (CTGF), mRNA [NM_001901]
2.18	NM_174919	Homo sapiens hypothetical protein LOC201175 (LOC201175), mRNA [NM_174919]
2.178	NM_020999	Homo sapiens neurogenin 3 (NEUROG3), mRNA [NM_020999]
2.164	NM_024908	Homo sapiens WD repeat domain 76 (WDR76), mRNA [NM_024908]
2.139	AK096643	Homo sapiens cDNA FLJ39324 fis, clone OCBBF2015115. [AK096643]
2.136	NM_024721	Homo sapiens zinc finger homeodomain 4 (ZFHX4), mRNA [NM_024721]
2.108	NM_003316	Homo sapiens tetratricopeptide repeat domain 3 (TTC3), transcript variant 1, mRNA [NM_003316]
2.097	NM_003613	Homo sapiens cartilage intermediate layer protein, nucleotide pyrophosphohydrolase (CILP), mRNA [NM_003613]
2.091	AA743218	AA743218 ny21c02.s1 NCI_CGAP_GCB1 Homo sapiens cDNA clone IMAGE:1272386 3' similar to gb:S87759 PROTEIN PHOSPHATASE 2C ALPHA ISOFORM (HUMAN);, mRNA sequence [AA743218]
2.084	NM_207336	Homo sapiens zinc finger protein 467 (ZNF467), mRNA [NM_207336]
2.048	NM_005319	Homo sapiens histone 1, H1c (HIST1H1C), mRNA [NM_005319]
2.036	NM_006522	Homo sapiens wingless-type MMTV integration site family, member 6 (WNT6), mRNA [NM_006522]
2.036	NM_144651	Homo sapiens peroxidasin homolog-like (Drosophila) (PXDNL), mRNA [NM_144651]
B. Downregulated genes
Normalized Data	Genbank	Description
-100	BG260785	602372369F1 NIH_MGC_93 cDNA clone IMAGE:4480240 5', mRNA sequence [BG260785]
-38.1679	AK128775	cDNA FLJ45390 fis, clone BRHIP3025844. [AK128775]
-32.3625	NM_024080	transient receptor potential cation channel, subfamily M, member 8 (TRPM8), mRNA [NM_024080]
-30.1205	NM_173526	chromosome 14 open reading frame 54 (C14orf54), mRNA [NM_173526]
-21.8341	AK096685	cDNA FLJ39366 fis, clone PEBLM2006283. [AK096685]
-20.9205	NM_001005785	deleted in azoospermia 2 (DAZ2), transcript variant 2, mRNA [NM_001005785]
-20.5339	AK022213	cDNA FLJ12151 fis, clone MAMMA1000431. [AK022213]
-20	NM_006085	3'(2'), 5'-bisphosphate nucleotidase 1 (BPNT1), mRNA [NM_006085]
-19.8413	NM_005468	N-acetylated alpha-linked acidic dipeptidase-like 1 (NAALADL1), mRNA [NM_005468]
-17.5747	AK094526	cDNA FLJ37207 fis, clone BRALZ2007576. [AK094526]
-16.2866	NM_000640	interleukin 13 receptor, alpha 2 (IL13RA2), mRNA [NM_000640]
-15.6986	NM_002427	matrix metalloproteinase 13 (collagenase 3) (MMP13), mRNA [NM_002427]
-15.2207	BC037893	Homo sapiens, clone IMAGE:5275301, mRNA. [BC037893]
-14.2045	NM_173554	chromosome 10 open reading frame 107 (C10orf107), mRNA [NM_173554]
-11.3379	BX114326	BX114326 Soares_testis_NHT cDNA clone IMAGp998M091961, mRNA sequence [BX114326]
-8.69565	NM_000536	recombination activating gene 2 (RAG2), mRNA [NM_000536]
-7.69231	NM_021158	tribbles homolog 3 (Drosophila) (TRIB3), mRNA [NM_021158]
-7.29927	NM_002421	matrix metalloproteinase 1 (interstitial collagenase) (MMP1), mRNA [NM_002421]
-6.99301	BC036693	hypothetical LOC541467, mRNA (cDNA clone IMAGE:5263822), partial cds. [BC036693]
-6.71141	NM_000575	interleukin 1, alpha (IL1A), mRNA [NM_000575]
-6.13497	NM_000609	chemokine (C-X-C motif) ligand 12 (stromal cell-derived factor 1) (CXCL12), transcript variant 1, mRNA [NM_000609]
-6.0241	NM_015714	putative lymphocyte G0/G1 switch gene (G0S2), mRNA [NM_015714]
-6.0241	NM_000689	aldehyde dehydrogenase 1 family, member A1 (ALDH1A1), mRNA [NM_000689]
-5.84795	NM_000186	complement factor H (CFH), transcript variant 1, mRNA [NM_000186]
-5.55556	BC007357	cDNA clone IMAGE:3621839, partial cds. [BC007357]
-5.37634	NM_030773	tubulin, beta 1 (TUBB1), mRNA [NM_030773]
-5.29101	AY204747	chromosome 21 open reading frame 24 isoform 5 (C21orf24) mRNA, complete sequence. [AY204747]
-5.20833	NM_002727	proteoglycan 1, secretory granule (PRG1), mRNA [NM_002727]
-5.18135	NM_005711	EGF-like repeats and discoidin I-like domains 3 (EDIL3), mRNA [NM_005711]
-4.97512	NM_003714	stanniocalcin 2 (STC2), mRNA [NM_003714]
-4.87805	NM_013391	dimethylglycine dehydrogenase (DMGDH), nuclear gene encoding mitochondrial protein, mRNA [NM_013391]
-4.56621	NM_058172	anthrax toxin receptor 2 (ANTXR2), mRNA [NM_058172]
-4.5045	AK075052	cDNA FLJ90571 fis, clone OVARC1001725, highly similar to patched related protein TRC8 (TRC8) gene. [AK075052]
-4.36681	NM_001673	asparagine synthetase (ASNS), transcript variant 2, mRNA [NM_001673]
-4.34783	NM_004083	DNA-damage-inducible transcript 3 (DDIT3), mRNA [NM_004083]
-4.21941	NM_004563	phosphoenolpyruvate carboxykinase 2 (mitochondrial) (PCK2), nuclear gene encoding mitochondrial protein, transcript variant 1, mRNA [NM_004563]
-4.20168	AK092228	cDNA FLJ34909 fis, clone NT2RI2009301, moderately similar to BIFUNCTIONAL METHYLENETETRAHYDROFOLATE DEHYDROGENASE/CYCLOHYDROLASE, MITOCHONDRIAL PRECURSOR. [AK092228]
-4.14938	NM_198545	hypothetical gene supported by AK075558; BC021286 (LOC374946), mRNA [NM_198545]
-4.08163	NM_005472	potassium voltage-gated channel, Isk-related family, member 3 (KCNE3), mRNA [NM_005472]
-4.06504	NM_002113	complement factor H-related 1 (CFHL1), mRNA [NM_002113]
-4.03226	NM_006472	thioredoxin interacting protein (TXNIP), mRNA [NM_006472]
-4.03226	NM_144717	fibronectin type III domain containing 6 (FNDC6), mRNA [NM_144717]
-3.96825	NM_001007245	interferon-related developmental regulator 1 (IFRD1), transcript variant 2, mRNA [NM_001007245]
-3.96825	NM_012449	six transmembrane epithelial antigen of the prostate 1 (STEAP1), mRNA [NM_012449]
-3.90625	NM_006963	zinc finger protein 22 (KOX 15) (ZNF22), mRNA [NM_006963]
-3.87597	NM_001029857	hypothetical protein LOC158381 (LOC158381), mRNA [NM_001029857]
-3.861	NM_002126	hepatic leukemia factor (HLF), mRNA [NM_002126]
-3.84615	NM_152556	hypothetical protein FLJ31818 (FLJ31818), mRNA [NM_152556]
-3.81679	NM_024812	brain and acute leukemia, cytoplasmic (BAALC), transcript variant 1, mRNA [NM_024812]
-3.77358	AL359062	mRNA full length insert cDNA clone EUROIMAGE 1913076. [AL359062]
-3.73134	NM_001778	CD48 antigen (B-cell membrane protein) (CD48), mRNA [NM_001778]
-3.73134	CR615261	full-length cDNA clone CS0DI076YA24 of Placenta Cot 25-normalized of (human). [CR615261]
-3.67647	NM_021023	complement factor H-related 3 (CFHL3), mRNA [NM_021023]
-3.55872	NM_004705	protein-kinase, interferon-inducible double stranded RNA dependent inhibitor, repressor of (P58 repressor) (PRKRIR), mRNA [NM_004705]
-3.53357	NM_000450	selectin E (endothelial adhesion molecule 1) (SELE), mRNA [NM_000450]
-3.52113	NM_000204	I factor (complement) (IF), mRNA [NM_000204]
-3.52113	NM_002752	mitogen-activated protein kinase 9 (MAPK9), transcript variant 1, mRNA [NM_002752]
-3.50877	NM_018948	mitogen-inducible gene 6 (MIG-6), mRNA [NM_018948]
-3.50877	NM_006636	methylenetetrahydrofolate dehydrogenase (NADP+ dependent) 2, methenyltetrahydrofolate cyclohydrolase (MTHFD2), nuclear gene encoding mitochondrial protein, mRNA [NM_006636]
-3.47222	NM_152355	zinc finger protein 441 (ZNF441), mRNA [NM_152355]
-3.47222	BF378976	BF378976 QV1-UM0099-020400-141-b12_1 UM0099 cDNA, mRNA sequence [BF378976]
-3.42466	NM_015555	zinc finger protein 451 (ZNF451), mRNA [NM_015555]
-3.40136	NM_152495	cornichon homolog 3 (Drosophila) (CNIH3), mRNA [NM_152495]
-3.3557	NM_004348	runt-related transcription factor 2 (RUNX2), transcript variant 3, mRNA [NM_004348]
-3.3557	NM_170744	unc-5 homolog B (C. elegans) (UNC5B), mRNA [NM_170744]
-3.30033	NM_012385	p8 protein (candidate of metastasis 1) (P8), mRNA [NM_012385]
-3.26797	NM_003666	basic leucine zipper nuclear factor 1 (JEM-1) (BLZF1), mRNA [NM_003666]
-3.25733	NM_002709	protein phosphatase 1, catalytic subunit, beta isoform (PPP1CB), transcript variant 1, mRNA [NM_002709]
-3.23625	NM_001731	B-cell translocation gene 1, anti-proliferative (BTG1), mRNA [NM_001731]
-3.23625	CR608563	full-length cDNA clone CS0DI029YI16 of Placenta Cot 25-normalized of (human). [CR608563]
-3.20513	CR603342	full-length cDNA clone CS0DL007YF01 of B cells (Ramos cell line) Cot 25-normalized of (human). [CR603342]
-3.16456	NM_001902	cystathionase (cystathionine gamma-lyase) (CTH), transcript variant 1, mRNA [NM_001902]
-3.15457	NM_001299	calponin 1, basic, smooth muscle (CNN1), mRNA [NM_001299]
-3.15457	BC015794	brain expressed X-linked-like 1, mRNA (cDNA clone IMAGE:3909303), partial cds. [BC015794]
-3.15457	NM_024746	KIAA1822-like (KIAA1822L), mRNA [NM_024746]
-3.11526	ENST00000320831	cDNA FLJ39207 fis, clone OCBBF2005956. [AK096526]
-3.11526	NM_005819	syntaxin 6 (STX6), mRNA [NM_005819]
-3.09598	NM_006163	nuclear factor (erythroid-derived 2), 45kDa (NFE2), mRNA [NM_006163]
-3.09598	NM_145756	zinc finger protein 396 (ZNF396), mRNA [NM_145756]
-3.09598	NM_007332	transient receptor potential cation channel, subfamily A, member 1 (TRPA1), mRNA [NM_007332]
-3.09598	AK124390	cDNA FLJ42399 fis, clone ASTRO2003024. [AK124390]
-3.09598	AY358772	clone DNA139632 VGSA5840 (UNQ5840) mRNA, complete cds. [AY358772]
-3.07692	NM_182908	dehydrogenase/reductase (SDR family) member 2 (DHRS2), transcript variant 1, mRNA [NM_182908]
-3.06748	NM_152780	hypothetical protein FLJ14503 (FLJ14503), mRNA [NM_152780]
-3.04878	AA604851	AA604851 no92g02.s1 NCI_CGAP_Pr2 cDNA clone IMAGE:1114322, mRNA sequence [AA604851]
-3.03951	NM_001924	growth arrest and DNA-damage-inducible, alpha (GADD45A), mRNA [NM_001924]
-3.01205	NM_173653	solute carrier family 9 (sodium/hydrogen exchanger), isoform 9 (SLC9A9), mRNA [NM_173653]
-2.97619	NM_004864	growth differentiation factor 15 (GDF15), mRNA [NM_004864]
-2.96736	NM_022791	matrix metalloproteinase 19 (MMP19), transcript variant rasi-6, mRNA [NM_022791]
-2.94118	NM_004848	chromosome 1 open reading frame 38 (C1orf38), mRNA [NM_004848]
-2.91545	NM_002899	retinol binding protein 1, cellular (RBP1), mRNA [NM_002899]
-2.90698	NM_014594	zinc finger protein 354C (ZNF354C), mRNA [NM_014594]
-2.90698	NM_006451	poly(A) binding protein interacting protein 1 (PAIP1), transcript variant 1, mRNA [NM_006451]
-2.89017	NM_012286	mortality factor 4 like 2 (MORF4L2), mRNA [NM_012286]
-2.89017	NM_004414	Down syndrome critical region gene 1 (DSCR1), transcript variant 1, mRNA [NM_004414]
-2.89017	NM_181661	vacuolar protein sorting 13B (yeast) (VPS13B), transcript variant 4, mRNA [NM_181661]
-2.87356	NM_001014975	complement factor H (CFH), transcript variant 2, mRNA [NM_001014975]
-2.87356	NM_016125	PTD016 protein (LOC51136), mRNA [NM_016125]
-2.849	NM_058179	phosphoserine aminotransferase 1 (PSAT1), transcript variant 1, mRNA [NM_058179]
-2.7933	NM_003937	kynureninase (L-kynurenine hydrolase) (KYNU), mRNA [NM_003937]
-2.7933	NM_017822	hypothetical protein FLJ20436 (FLJ20436), mRNA [NM_017822]
-2.78552	NM_004990	methionine-tRNA synthetase (MARS), mRNA [NM_004990]
-2.78552	NM_018476	brain expressed, X-linked 1 (BEX1), mRNA [NM_018476]
-2.78552	NM_001013631	heterogeneous nuclear ribonucleoprotein C-like 1 (HNRPCL1), mRNA [NM_001013631]
-2.74725	NM_006601	prostaglandin E synthase 3 (cytosolic) (PTGES3), mRNA [NM_006601]
-2.74725	AK026149	cDNA: FLJ22496 fis, clone HRC11236. [AK026149]
-2.73224	NM_005410	selenoprotein P, plasma, 1 (SEPP1), mRNA [NM_005410]
-2.7248	NM_183376	arrestin domain containing 4 (ARRDC4), mRNA [NM_183376]
-2.7248	NM_024725	hypothetical protein FLJ23518 (FLJ23518), mRNA [NM_024725]
-2.7248	NM_153347	hypothetical protein FLJ90119 (FLJ90119), mRNA [NM_153347]
-2.71739	NM_005171	activating transcription factor 1 (ATF1), mRNA [NM_005171]
-2.71003	NM_024045	DEAD (Asp-Glu-Ala-Asp) box polypeptide 50 (DDX50), mRNA [NM_024045]
-2.71003	ENST00000340614	PREDICTED: similar to transcription elongation factor IIS - mouse (LOC340501), mRNA [XM_294568]
-2.71003	NM_183045	ring finger protein (C3H2C3 type) 6 (RNF6), transcript variant 2, mRNA [NM_183045]
-2.7027	NM_005412	serine hydroxymethyltransferase 2 (mitochondrial) (SHMT2), mRNA [NM_005412]
-2.7027	NM_207035	chromosome 1 open reading frame 63 (C1orf63), transcript variant 1, mRNA [NM_207035]
-2.7027	THC2313842	AP001753 HES1 protein {Homo sapiens;} , partial (21%) [THC2313842]
-2.69542	CR603982	full-length cDNA clone CS0DF021YL03 of Fetal brain of (human). [CR603982]
-2.68817	NM_001675	activating transcription factor 4 (tax-responsive enhancer element B67) (ATF4), transcript variant 1, mRNA [NM_001675]
-2.68097	NM_014585	solute carrier family 40 (iron-regulated transporter), member 1 (SLC40A1), mRNA [NM_014585]
-2.68097	NM_032947	putative small membrane protein NID67 (NID67), mRNA [NM_032947]
-2.6738	NM_012176	F-box protein 4 (FBXO4), transcript variant 1, mRNA [NM_012176]
-2.6738	NM_001012452	hypothetical protein FLJ32679 (FLJ32679), mRNA [NM_001012452]
-2.66667	NM_002970	spermidine/spermine N1-acetyltransferase (SAT), mRNA [NM_002970]
-2.6455	NM_133484	TRAF family member-associated NFKB activator (TANK), transcript variant 2, mRNA [NM_133484]
-2.63852	NM_005384	nuclear factor, interleukin 3 regulated (NFIL3), mRNA [NM_005384]
-2.63852	NM_015532	glutamate receptor, ionotropic, N-methyl D-aspartate-like 1A (GRINL1A), transcript variant 1, mRNA [NM_015532]
-2.63158	NM_183422	TSC22 domain family, member 1 (TSC22D1), transcript variant 1, mRNA [NM_183422]
-2.63158	NM_014670	basic leucine zipper and W2 domains 1 (BZW1), mRNA [NM_014670]
-2.62467	NM_016061	yippee-like 5 (Drosophila) (YPEL5), mRNA [NM_016061]
-2.6178	NM_018098	epithelial cell transforming sequence 2 oncogene (ECT2), mRNA [NM_018098]
-2.61097	NM_019058	DNA-damage-inducible transcript 4 (DDIT4), mRNA [NM_019058]
-2.60417	AK022339	cDNA FLJ12277 fis, clone MAMMA1001711. [AK022339]
-2.5974	NM_181077	88-kDa golgi protein (GM88), transcript variant 3, mRNA [NM_181077]
-2.5974	BF210146	601874052F1 NIH_MGC_54 cDNA clone IMAGE:4098852 5', mRNA sequence [BF210146]
-2.5641	NM_203355	CTAGE family, member 5 (CTAGE5), transcript variant 3, mRNA [NM_203355]
-2.5641	NM_001012398	fused toes homolog (mouse) (FTS), transcript variant 1, mRNA [NM_001012398]
-2.55754	NM_000962	prostaglandin-endoperoxide synthase 1 (prostaglandin G/H synthase and cyclooxygenase) (PTGS1), transcript variant 1, mRNA [NM_000962]
-2.55754	NM_052965	chromosome 1 open reading frame 19 (C1orf19), mRNA [NM_052965]
-2.55754	NM_001009894	hypothetical protein DKFZp434N2030 (DKFZp434N2030), mRNA [NM_001009894]
-2.55754	NM_006948	stress 70 protein chaperone, microsome-associated, 60kDa (STCH), mRNA [NM_006948]
-2.54453	NM_018357	La ribonucleoprotein domain family, member 6 (LARP6), transcript variant 1, mRNA [NM_018357]
-2.54453	NM_153234	Lix1 homolog (mouse) (LIX1), mRNA [NM_153234]
-2.52525	NM_022135	popeye domain containing 2 (POPDC2), mRNA [NM_022135]
-2.52525	NM_005194	CCAAT/enhancer binding protein (C/EBP), beta (CEBPB), mRNA [NM_005194]
-2.5	NM_182314	cytosolic ovarian carcinoma antigen 1 (COVA1), transcript variant 2, mRNA [NM_182314]
-2.49377	NM_004071	CDC-like kinase 1 (CLK1), transcript variant 1, mRNA [NM_004071]
-2.48139	NM_053279	chromosome 8 open reading frame 13 (C8orf13), mRNA [NM_053279]
-2.47525	NM_058229	F-box protein 32 (FBXO32), transcript variant 1, mRNA [NM_058229]
-2.46914	NM_002290	laminin, alpha 4 (LAMA4), mRNA [NM_002290]
-2.46914	AL834140	mRNA; cDNA DKFZp434A2029 (from clone DKFZp434A2029). [AL834140]
-2.46305	NM_003500	acyl-Coenzyme A oxidase 2, branched chain (ACOX2), mRNA [NM_003500]
-2.46305	AK023391	cDNA FLJ13329 fis, clone OVARC1001795. [AK023391]
-2.457	BC020516	interferon regulatory factor 2 binding protein 2, mRNA (cDNA clone IMAGE:3882977), partial cds. [BC020516]
-2.457	THC2363021	BF762673 CM0-CS0042-201000-604-b04 CS0042 cDNA, mRNA sequence [BF762673]
-2.45098	NM_173613	hypothetical protein FLJ35785 (FLJ35785), mRNA [NM_173613]
-2.45098	BX648070	mRNA; cDNA DKFZp686I15210 (from clone DKFZp686I15210). [BX648070]
-2.44499	NM_001014438	cysteinyl-tRNA synthetase (CARS), transcript variant 4, mRNA [NM_001014438]
-2.43902	NM_016109	angiopoietin-like 4 (ANGPTL4), transcript variant 2, mRNA [NM_016109]
-2.43902	NM_001873	carboxypeptidase E (CPE), mRNA [NM_001873]
-2.43902	NM_001004127	similar to hypothetical protein B230397C21 (LOC440138), mRNA [NM_001004127]
-2.43902	NM_014685	homocysteine-inducible, endoplasmic reticulum stress-inducible, ubiquitin-like domain member 1 (HERPUD1), transcript variant 1, mRNA [NM_014685]
-2.43309	NM_002852	pentraxin-related gene, rapidly induced by IL-1 beta (PTX3), mRNA [NM_002852]
-2.43309	NM_033255	epithelial stromal interaction 1 (breast) (EPSTI1), mRNA [NM_033255]
-2.42131	NM_005325	histone 1, H1a (HIST1H1A), mRNA [NM_005325]
-2.42131	NM_138811	chromosome 7 open reading frame 31 (C7orf31), mRNA [NM_138811]
-2.41546	NM_033296	Mof4 family associated protein 1 (MRFAP1), mRNA [NM_033296]
-2.41546	BC007638	hypothetical protein FLJ13840, mRNA (cDNA clone MGC:15905 IMAGE:3533045), complete cds. [BC007638]
-2.41546	NM_017775	tetratricopeptide repeat domain 19 (TTC19), mRNA [NM_017775]
-2.40964	NM_000681	adrenergic, alpha-2A-, receptor (ADRA2A), mRNA [NM_000681]
-2.40964	NM_006623	phosphoglycerate dehydrogenase (PHGDH), mRNA [NM_006623]
-2.40385	NM_005486	target of myb1-like 1 (chicken) (TOM1L1), mRNA [NM_005486]
-2.40385	NM_016626	ring finger and KH domain containing 2 (RKHD2), mRNA [NM_016626]
-2.40385	NM_032357	hypothetical protein MGC12981 (MGC12981), mRNA [NM_032357]
-2.39808	NM_138700	tripartite motif-containing 40 (TRIM40), mRNA [NM_138700]
-2.39808	NM_138803	hypothetical protein BC015395 (LOC130940), mRNA [NM_138803]
-2.39234	AF024709	clone L3-15 zinc finger protein mRNA, partial cds. [AF024709]
-2.39234	NM_014177	chromosome 18 open reading frame 55 (C18orf55), mRNA [NM_014177]
-2.38663	ENST00000315313	hypothetical protein FLJ35848, mRNA (cDNA clone IMAGE:5402642), partial cds. [BC041481]
-2.38095	NM_007350	pleckstrin homology-like domain, family A, member 1 (PHLDA1), mRNA [NM_007350]
-2.3753	NM_007195	polymerase (DNA directed) iota (POLI), mRNA [NM_007195]
-2.36407	NM_024754	pentatricopeptide repeat domain 2 (PTCD2), mRNA [NM_024754]
-2.35849	NM_001338	coxsackie virus and adenovirus receptor (CXADR), mRNA [NM_001338]
-2.35849	NM_016142	hydroxysteroid (17-beta) dehydrogenase 12 (HSD17B12), mRNA [NM_016142]
-2.35294	NM_003330	thioredoxin reductase 1 (TXNRD1), transcript variant 1, mRNA [NM_003330]
-2.35294	BC094802	cDNA clone IMAGE:5271477, containing frame-shift errors. [BC094802]
-2.34742	NM_182398	ribosomal protein S6 kinase, 90kDa, polypeptide 5 (RPS6KA5), transcript variant 2, mRNA [NM_182398]
-2.34742	NM_033017	tripartite motif-containing 4 (TRIM4), transcript variant alpha, mRNA [NM_033017]
-2.33645	NM_016331	zinc finger protein 639 (ZNF639), mRNA [NM_016331]
-2.331	NM_145244	DNA-damage-inducible transcript 4-like (DDIT4L), mRNA [NM_145244]
-2.30947	NM_015938	NMD3 homolog (S. cerevisiae) (NMD3), mRNA [NM_015938]
-2.30415	BX647750	mRNA; cDNA DKFZp779H233 (from clone DKFZp779H233). [BX647750]
-2.29885	NM_015894	stathmin-like 3 (STMN3), mRNA [NM_015894]
-2.29358	NM_018027	FERM domain containing 4A (FRMD4A), mRNA [NM_018027]
-2.29358	NM_033169	UDP-Gal:betaGlcNAc beta 1,3-galactosyltransferase, polypeptide 3 (B3GALT3), transcript variant 4, mRNA [NM_033169]
-2.28833	NM_152719	testis-specific leucine zipper protein nurit (NURIT), mRNA [NM_152719]
-2.28311	NM_004454	ets variant gene 5 (ets-related molecule) (ETV5), mRNA [NM_004454]
-2.28311	CR618687	full-length cDNA clone CS0CAP008YE23 of Thymus of (human). [CR618687]
-2.27273	NM_021800	DnaJ (Hsp40) homolog, subfamily C, member 12 (DNAJC12), transcript variant 1, mRNA [NM_021800]
-2.26757	NM_014606	hect domain and RLD 3 (HERC3), mRNA [NM_014606]
-2.26244	NM_003104	sorbitol dehydrogenase (SORD), mRNA [NM_003104]
-2.26244	NM_053067	ubiquilin 1 (UBQLN1), transcript variant 2, mRNA [NM_053067]
-2.25734	BX538289	mRNA; cDNA DKFZp779C185 (from clone DKFZp779C185). [BX538289]
-2.25225	CR620400	full-length cDNA clone CS0DJ015YA13 of T cells (Jurkat cell line) Cot 10-normalized of (human). [CR620400]
-2.24719	NM_003690	protein kinase, interferon-inducible double stranded RNA dependent activator (PRKRA), mRNA [NM_003690]
-2.24215	NM_032906	hypothetical protein MGC14156 (MGC14156), mRNA [NM_032906]
-2.23714	NM_004798	kinesin family member 3B (KIF3B), mRNA [NM_004798]
-2.23714	NM_016048	isochorismatase domain containing 1 (ISOC1), mRNA [NM_016048]
-2.23214	ENST00000313934	cDNA FLJ25692 fis, clone TST04461. [AK098558]
-2.23214	NM_021127	phorbol-12-myristate-13-acetate-induced protein 1 (PMAIP1), mRNA [NM_021127]
-2.22717	NM_018254	REST corepressor 3 (RCOR3), mRNA [NM_018254]
-2.22717	CR625561	full-length cDNA clone CS0DJ002YM03 of T cells (Jurkat cell line) Cot 10-normalized of (human). [CR625561]
-2.22222	NM_152380	T-box 15 (TBX15), mRNA [NM_152380]
-2.22222	U60873	Human clone 137308 mRNA, partial cds. [U60873]
-2.20751	NM_004748	cell cycle progression 1 (CCPG1), transcript variant 1, mRNA [NM_004748]
-2.20751	BC022205	Homo sapiens, clone IMAGE:5258564, mRNA. [BC022205]
-2.1978	AK021552	cDNA FLJ11490 fis, clone HEMBA1001918. [AK021552]
-2.19298	NM_004447	epidermal growth factor receptor pathway substrate 8 (EPS8), mRNA [NM_004447]
-2.19298	NM_003440	zinc finger protein 140 (clone pHZ-39) (ZNF140), mRNA [NM_003440]
-2.18818	NM_173674	discoidin, CUB and LCCL domain containing 1 (DCBLD1), mRNA [NM_173674]
-2.18341	NM_002006	fibroblast growth factor 2 (basic) (FGF2), mRNA [NM_002006]
-2.18341	NM_007145	zinc finger protein 146 (ZNF146), mRNA [NM_007145]
-2.17391	AF220656	apoptosis-associated nuclear protein PHLDA1 (PHLDA1) mRNA, partial cds. [AF220656]
-2.17391	NM_144710	septin 10 (SEPT10), transcript variant 1, mRNA [NM_144710]
-2.1692	NM_022173	TIA1 cytotoxic granule-associated RNA binding protein (TIA1), transcript variant 2, mRNA [NM_022173]
-2.15517	NM_032228	male sterility domain containing 2 (MLSTD2), mRNA [NM_032228]
-2.15517	NM_000019	acetyl-Coenzyme A acetyltransferase 1 (acetoacetyl Coenzyme A thiolase) (ACAT1), nuclear gene encoding mitochondrial protein, mRNA [NM_000019]
-2.15517	NM_201431	Ras association (RalGDS/AF-6) domain family 6 (RASSF6), transcript variant 2, mRNA [NM_201431]
-2.15054	NM_012258	hairy/enhancer-of-split related with YRPW motif 1 (HEY1), mRNA [NM_012258]
-2.15054	NM_006276	splicing factor, arginine/serine-rich 7, 35kDa (SFRS7), mRNA [NM_006276]
-2.15054	NM_194271	ring finger protein 34 (RNF34), transcript variant 1, mRNA [NM_194271]
-2.14592	NM_006038	spermatogenesis associated 2 (SPATA2), mRNA [NM_006038]
-2.12314	NM_020654	SUMO1/sentrin specific protease 7 (SENP7), mRNA [NM_020654]
-2.12314	NM_133458	zinc finger protein 90 homolog (mouse) (ZFP90), mRNA [NM_133458]
-2.11864	NM_021998	zinc finger protein 6 (CMPX1) (ZNF6), mRNA [NM_021998]
-2.11864	NM_152295	threonyl-tRNA synthetase (TARS), mRNA [NM_152295]
-2.11864	NM_199190	La ribonucleoprotein domain family, member 4 (LARP4), transcript variant 3, mRNA [NM_199190]
-2.11416	NM_212472	protein kinase, cAMP-dependent, regulatory, type I, alpha (tissue specific extinguisher 1) (PRKAR1A), transcript variant 3, mRNA [NM_212472]
-2.1097	NM_176800	PRP4 pre-mRNA processing factor 4 homolog B (yeast) (PRPF4B), transcript variant 2, mRNA [NM_176800]
-2.10526	NM_019556	motile sperm domain containing 1 (MOSPD1), mRNA [NM_019556]
-2.10084	NM_003031	seven in absentia homolog 1 (Drosophila) (SIAH1), transcript variant 1, mRNA [NM_003031]
-2.08768	NM_173672	peptidylprolyl isomerase (cyclophilin)-like 6 (PPIL6), mRNA [NM_173672]
-2.08333	NM_014226	renal tumor antigen (RAGE), mRNA [NM_014226]
-2.08333	NM_006744	retinol binding protein 4, plasma (RBP4), mRNA [NM_006744]
-2.08333	AK128423	cDNA FLJ46566 fis, clone THYMU3040829, moderately similar to Cold-inducible RNA-binding protein. [AK128423]
-2.07469	NM_139246	chromosome 9 open reading frame 97 (C9orf97), mRNA [NM_139246]
-2.06186	NM_000624	serine (or cysteine) proteinase inhibitor, clade A (alpha-1 antiproteinase, antitrypsin), member 5 (SERPINA5), mRNA [NM_000624]
-2.06186	NM_016454	hypothetical protein LOC51234 (LOC51234), mRNA [NM_016454]
-2.05761	NM_032744	chromosome 6 open reading frame 105 (C6orf105), mRNA [NM_032744]
-2.04918	AK026140	cDNA: FLJ22487 fis, clone HRC10931. [AK026140]
-2.01207	NM_203462	Morf4 family associated protein 1-like 1 (MRFAP1L1), transcript variant 2, mRNA [NM_203462]
